# Supplementary material for: Evolutionary Plasticity in Detoxification Gene Modules: The Preservation and Loss of the Pregnane X Receptor in Chondrichthyes Lineages
Source: Int J Mol Sci. 2019 May 10;20(9):2331. doi: 10.3390/ijms20092331 (PMC6539745; doi:10.3390/ijms20092331)
Supplement: Supplementary file 1 [file ijms-20-02331-s001.xlsx]

## Sheet: Table S1
Table S1. List of sequences used for phylogenetic reconstruction of VDR, PXR and CAR genes and corresponding accession numbers.
Species	NR1I1/VDR	NR1I2/PXR	NR1I3/CAR
Homo sapiens	NP_000367.1	NP_003880.3	NP_001070950.1
Mus musculus	NP_033530.2	NP_035066.1	NP_033933.2
Rattus norvegicus	NP_058754.1	NP_443212.1	NP_075230.1
Sus scrofa	NP_001090883.1	NP_001033094.1	NP_001033085.1
Bos taurus	NP_001161404.2	NP_001096696.1	NP_001073236.1
Oryctolagus cuniculus	XP_017194999.1	NP_001075536.1	XP_017201220.1
Gallus gallus	NP_990429.1	-	NP_990033.1
Anas platyrhynchos	XP_021122847.1	-	-
Anolis carolinensis	XP_008101719.1	-	XP_003230590.2
Xenopus tropicalis	XP_002935703.1	NP_001091887.1	ADW81978.1
Danio rerio A	NP_570994.1	XP_005167477.1	-
Danio rerio B	NP_001153457.1		-
Cyprinus carpio A	XP_018939074.1	APX55174.1	-
Cyprinus carpio B	XP_018951347.1		-
Oryzias latipes A	NP_001121988.1	ABV29345.1	-
Oryzias latipes B	NP_001121989.1		-
Oreochromis niloticus A	XP_005454147.1	NP_001269825.1	-
Oreochromis niloticus B	XP_003441588.1		-
Scleropages formosus A	XP_018615991.1	XP_018599579.1	-
Scleropages formosus B	XP_018581562.1		-
Lepisosteus oculatus	XP_015199783.1	XP_006639043.1	-
Leucoraja erinacea	AIM62165.1	-	-
Chiloscyllium punctatum	VDR_Cpunctatum1	-	-
Rhyncodon typus	VDR_Rtypus2	-	-
Scyliorhinus torazame	VDR_Storazame3	-	-
Callorhinchus milii	XP_007908698.1	XP_007894039.1	-
Petromyzon marinus	AAP05810.1	-	-
Ciona intestinalis A	AHB39788.1	-	-
Ciona intestinalis B	NP_001037831.1	-	-
1,3 These sequences were built bioinformatically, using the .fasta and gff files of C. punctatum and S. torazame species.
Acession	Protein Sequence	Nucleotide Sequence
VDR_Cpunctatum	MVCEVGLDSGFLKGDGATCLGVSSAEMDQMAVSSSAYQPEDDEFDRNCPRICGVCGDKATGFHFNAMTCEGCKGFFRRSMKKKANFTCPFNGNCSITKDNRRHCQACRLKRCQDIGMMKEFILTDEEVQRKKEMILKRKEEEAVKEAKKPKLSEEQEKLIALLVDAHHKTFDTSYSYLSQFRPPVRDESKMEESEQSTSTDASQNLCSADSFGFDSFTASFPEGCNLSIDMSELPKLDFSIFGMIQDGTNSPMRSEKLPMLPHLADLVSYSIQKVVYFAKAIPGFRELLADDQIALLKSSAIEIIMLRSNESFSVEDMSWKCGNDEFKYDINDVTKAGHSLELLEPLIKFQVGLKNLNLHEAEHVLLMAICILSPDRPGVQNRVQVERIQDGLSETLQS…	ATGGTATGTGAAGTGGGGTTGGACAGCGGGTTTCTGAAGGGAGACGGTGCTACTTGTTTAGGTGTATCAAGTGCAGAAATGGATCAGATGGCAGTGAGCTCGTCCGCGTATCAGCCTGAAGATGATGAATTTGATAGAAATTGCCCACGGATCTGTGGCGTTTGTGGGGACAAAGCGACTGGTTTCCATTTCAATGCCATGACCTGTGAAGGCTGTAAAGGCTTCTTCAGGAGAAGCATGAAGAAAAAGGCCAATTTCACCTGTCCTTTTAATGGCAACTGCTCAATTACAAAGGATAACAGAAGACATTGTCAAGCATGTAGACTCAAGCGATGTCAGGATATTGGCATGATGAAAGAATTCATTTTAACAGATGAAGAAGTTCAACGGAAAAAGGAG…
VDR_Storazame	MTGQVEFEVLNGKSFSHTCALSRKGRLLILRLSNPFSHFIGVSRIVEMEQMTVSSSACQPDDDEFDRNCPRICGVCGDKATGFHFNAMTCEGCKGFFRRSMKKKATFTCPFNGNCSITKDNRRHCQACRLKRCQDIGMMKEFILTDDEVQRKKEMILKRKEEEAIKEAKKPKLSDEQEQLIALLVDAHHKTYDSSYSFVTQFRPPIREESKMDESDQSSTDPSQNRCTADSFDFNFFNPASSQNCSPSIDMSALTKSDFTDIFGMLQDDSGSSKQQEDFPMLPHLADLVSYSIQKVVGFAKAIPGFRELAADDQISLLKSSAIEIIMLRSNQSFTLDDMSWNCGNDDFKYNISDVTKAGHSLELLEPLIKFQIGLKNLNLHEAEHVLLMAVCILSPDRP…	ATGACAGGTCAAGTTGAGTTTGAGGTACTGAATGGGAAGAGTTTCTCTCACACTTGTGCCTTGTCAAGAAAAGGGCGTTTGTTAATCCTGCGGCTGTCTAACCCATTCAGTCACTTCATAGGAGTGTCAAGAATTGTAGAAATGGAACAGATGACAGTGAGTTCGTCTGCATGTCAGCCTGACGATGACGAATTTGATCGAAATTGCCCGCGGATCTGTGGGGTTTGTGGGGACAAAGCAACCGGTTTCCATTTCAATGCCATGACCTGTGAAGGCTGTAAAGGCTTCTTCAGGAGAAGCATGAAGAAAAAGGCCACTTTTACCTGTCCTTTTAATGGCAACTGTTCAATTACAAAGGATAACAGAAGACATTGTCAAGCATGTAGACTCAAGCGATGC…
2 This sequence were built bioinformatically, using the .fasta and gff files of the new version of R .typus species (Rtypus_kobe_v1.0), the previous genome (ASM164234v2) and the raw data of the PRJNA255419 bioproject.
Acession	Protein Sequence	Nucleotide Sequence
VDR_Rtypus	MDQMAVSSSAYQPEDDEFDRNCPRICGVCGDRATGFHFNAMTCEGCKGFFRRSMKKKANFTCPFNGNCSITKDNRRHCQACRLKRCQDIGMMKEFILTDEEVQRKKEMILKRKEEEALKEAKKPKLSDEQEKLIALLIDAHHKTFDASYSYFSQFRPPVRDQSKMEESEQSTSTDASQNLCSADSFAFDSFSASFPEGCNLSIDMSELPKLDLSIFGMVHDGINGPKRNEKLTMLPHLADLVSYSIQKIVGFAKAIPGFRELLADDQIALLKSSAIEIIMLRSNESFSVEDMSWKCGNDEFKYDINDVTRAGHSLELLEPLIKFQVGLKNLNLHEPEHVLLMAICILSPDRPGVQNRVQVECIQDGLSETLQSYIRAKHPPPGNRLLYPKMIQKLTDLR…	ATGGATCAGATGGCAGTGAGCTCATCCGCATATCAGCCTGAAGATGACGAATTTGATAGAAATTGCCCACGGATCTGTGGCGTTTGTGGGGACAGAGCTACTGGTTTTCATTTCAATGCCATGACCTGTGAAGGCTGTAAAGGCTTCTTCAGGAGAAGCATGAAGAAAAAGGCCAATTTTACCTGTCCTTTTAATGGCAACTGTTCAATTACAAAGGATAACAGAAGACATTGTCAAGCATGTAGACTCAAGCGATGCCAGGATATTGGCATGATGAAAGAATTCATTTTAACAGATGAAGAAGTTCAGCGGAAAAAGGAGATGATTTTAAAACGTAAAGAAGAAGAAGCATTAAAGGAGGCAAAGAAACCAAAGTTGTCAGATGAACAAGAAAAATTG…

## Sheet: Table S2
Table S2. Blast-n output of human, elephant shark and whale shark (first version) genome sequences against the new version of the whale shark genome. The blast-n values were used to reconstruct the synteny of the locus in three target PXR, CAR and VDR.
Bait Species	Accession Number	Gene Symbol	Scaffolds of R. typus Genome	ID%	Length	Gaps	qstart	qend	sstart	send	E-valeu	Bitscore	Strand
R. typus	XM_020529942.1	COX17	scf_rhity00047988	100.000	125	0	1	125	871	995	7.24e-59	231	-
R. typus	XM_020529942.1	COX17	scf_rhity00001107	100.000	86	0	125	210	4203	4288	3.47e-37	159	-
R. typus	XM_020529932.1	POPDC2	scf_rhity00001107	100.000	494	0	1	494	28051	28544	0.0	913	-
R. typus	XM_020529932.1	POPDC2	scf_rhity00001107	99.420	345	1	597	940	38885	39229	1.54e-176	625	-
R. typus	XM_020529932.1	POPDC2	scf_rhity00001107	100.000	75	0	940	1014	46552	46626	2.44e-30	139	-
R. typus	XM_020521822.1	MAATS1	scf_rhity00035281	100.000	158	0	1	158	753	910	3.74e-76	292	+
R. typus	XM_020521822.1	MAATS1	scf_rhity00002454	98.864	88	1	155	242	1522	1608	5.13e-35	156	+
R. typus	XM_020521822.1	MAATS1	scf_rhity00002454	97.015	67	2	234	300	14663	14727	1.13e-21	111	+
R. typus	XM_020521822.1	MAATS1	scf_rhity00002454	100.000	177	0	300	476	19096	19272	1.03e-86	327	+
R. typus	XM_020521822.1	MAATS1	scf_rhity00002454	100.000	180	0	475	654	21188	21367	2.21e-88	333	+
R. typus	XM_020521822.1	MAATS1	scf_rhity00002454	99.379	161	0	651	811	28853	29013	3.74e-76	292	+
R. typus	XM_020521822.1	MAATS1	scf_rhity00002454	100.000	188	0	810	997	42870	43057	7.88e-93	348	+
R. typus	XM_020521822.1	MAATS1	scf_rhity00002454	100.000	142	0	994	1135	50626	50767	2.94e-67	263	+
R. typus	XM_020521822.1	MAATS1	scf_rhity00002454	100.000	120	0	1133	1252	58392	58511	4.98e-55	222	+
R. typus	XM_020521822.1	MAATS1	scf_rhity00002454	100.000	74	0	1250	1323	66112	66185	1.86e-29	137	+
R. typus	XM_020521822.1	MAATS1	scf_rhity00002454	100.000	148	0	1323	1470	67129	67276	1.36e-70	274	+
R. typus	XM_020521822.1	MAATS1	scf_rhity00002454	100.000	226	0	1469	1694	69016	69241	5.92e-114	418	+
R. typus	XM_020521822.1	MAATS1	scf_rhity00002454	100.000	152	0	1690	1841	70020	70171	8.11e-73	281	+
R. typus	XM_020521822.1	MAATS1	scf_rhity00002454	98.958	96	1	1842	1936	71091	71186	1.83e-39	171	+
R. typus	XM_020521822.1	MAATS1	scf_rhity00002454	100.000	181	0	1932	2112	73561	73741	6.13e-89	335	+
H. sapiens / C . milii	NM_003889.3 / XM_007910507.1	PXR	Not Found	-	-	-	-	-	-	-	-	-	-
R. typus	XM_020510094.1	GSK3B	scf_rhity00002454	100.000	89	0	1	89	267358	267270	5.06e-38	165	-
R. typus	XM_020510094.1	GSK3B	scf_rhity00002454	100.000	194	0	89	282	201200	201007	2.16e-96	359	-
R. typus	XM_020510094.1	GSK3B	scf_rhity00002454	100.000	84	0	283	366	181541	181458	3.04e-35	156	-
R. typus	XM_020510094.1	GSK3B	scf_rhity00002454	100.000	113	0	365	477	158782	158670	2.30e-51	209	-
R. typus	XM_020510094.1	GSK3B	scf_rhity00002454	100.000	131	0	478	608	150157	150027	2.27e-61	243	-
R. typus	XM_020510094.1	GSK3B	scf_rhity00002454	99.107	112	0	607	718	134673	134562	3.86e-49	202	-
R. typus	XM_020510094.1	GSK3B	scf_rhity00002454	100.000	103	0	713	815	131647	131545	8.35e-46	191	-
R. typus	XM_020510094.1	GSK3B	scf_rhity00002454	100.000	100	0	812	911	130814	130715	3.88e-44	185	-
R. typus	XM_020510094.1	GSK3B	scf_rhity00002454	100.000	189	0	908	1096	121245	121057	1.30e-93	350	-
R. typus	XM_020510094.1	GSK3B	scf_rhity00002454	99.038	104	0	1095	1198	118094	117991	1.08e-44	187	-
R. typus	XM_020510094.1	GSK3B	scf_rhity00002454	100.000	74	0	1193	1266	105787	105714	1.10e-29	137	-
R. typus	XM_020510092.1	GPR156	scf_rhity00000674	98.780	82	1	1	81	47016	46935	1.24e-31	145	-
R. typus	XM_020510092.1	GPR156	scf_rhity00000674	100.000	141	0	76	216	43310	43170	1.18e-66	261	-
R. typus	XM_020510092.1	GPR156	scf_rhity00000674	100.000	114	0	214	327	35559	35446	1.21e-51	211	-
R. typus	XM_020510092.1	GPR156	scf_rhity00000674	100.000	128	0	327	454	25807	25680	1.99e-59	237	-
R. typus	XM_020510092.1	GPR156	scf_rhity00000674	99.010	101	0	453	553	25552	25452	9.47e-43	182	-
R. typus	XM_020510092.1	GPR156	scf_rhity00000674	99.592	245	0	548	792	21279	21035	8.46e-123	448	-
R. typus	XM_020510092.1	GPR156	scf_rhity00000674	100.000	165	0	784	948	16350	16186	5.39e-80	305	-
R. typus	XM_020510092.1	GPR156	scf_rhity00000674	100.000	1415	0	947	2361	14923	13509	0.0	2614	-
R. typus	XM_020510093.1	LRRC58	scf_rhity00000674	100.000	68	0	1	68	159847	159780	1.37e-26	126	-
R. typus	XM_020510093.1	LRRC58	scf_rhity00000674	100.000	72	0	66	137	141792	141721	8.17e-29	134	-
R. typus	XM_020510093.1	LRRC58	scf_rhity00000674	100.000	131	0	137	267	134871	134741	1.30e-61	243	-
R. typus	XM_020510093.1	LRRC58	scf_rhity00000674	100.000	279	0	267	545	134278	134000	6.94e-144	516	-
R. typus	XM_020510093.1	LRRC58	scf_rhity00000674	100.000	196	0	543	738	133472	133277	9.57e-98	363	-
C. milii	XM_007895843.1	FST1L	scf_rhity00000674	81.928	83	0	463	545	360877	360795	2.09e-09	71.3	-
C. milii	XM_007895843.1	FST1L	scf_rhity00000674	83.962	106	0	563	668	358851	358746	7.41e-19	102	-
C. milii	XM_007895843.1	FST1L	scf_rhity00000674	84.286	70	0	669	738	357979	357910	7.51e-09	69.4	-
C. milii	XM_007895843.1	FST1L	scf_rhity00000674	78.947	76	0	928	1003	352263	352188	7.57e-04	52.8	-
C. milii	XM_007895843.1	FST1L	scf_rhity00000674	89.011	91	0	1420	1510	242446	242356	3.42e-22	113	-
C. milii	XM_007895843.1	FST1L	scf_rhity00000674	86.916	107	0	1525	1631	237430	237324	2.05e-24	121	-
C. milii	XM_007895843.1	FST1L	scf_rhity00000674	80.916	131	0	1677	1807	231151	231021	2.06e-19	104	-
C. milii	XM_007895843.1	FST1L	scf_rhity00000674	79.167	120	3	1808	1925	227198	227081	3.47e-12	80.5	-
C. milii	XM_007895843.1	FST1L	scf_rhity00000674	92.174	115	1	1930	2044	225312	225199	1.20e-36	161	-
C. milii	XM_007895843.1	FST1L	scf_rhity00000674	85.938	128	1	2039	2166	220985	220859	7.30e-29	135	-
C. milii	XM_007895843.1	FST1L	scf_rhity00000674	85.246	61	0	2203	2263	218613	218553	3.50e-07	63.9	-
C. milii	XM_007895843.1	FST1L	scf_rhity00000674	87.234	47	0	2261	2307	208555	208509	2.10e-04	54.7	-
H. sapiens	NM_001102566.1	PCP4L1	scf_rhity00056002	80.000	85	0	97	181	1353	1437	2.75e-08	63.9	-
H. sapiens	NM_001077482.2	CAR	Not Found	-	-	-	-	-	-	-	-	-	-
R. typus	XM_020523825.1	TOMM40L	scf_rhity00005237	100.000	97	0	292	388	95212	95308	1.47e-42	180	-
R. typus	XM_020523825.1	TOMM40L	scf_rhity00005237	100.000	104	0	386	489	96063	96166	1.89e-46	193	-
R. typus	XM_020523825.1	TOMM40L	scf_rhity00005237	100.000	110	0	487	596	96544	96653	8.74e-50	204	-
R. typus	XM_020523825.1	TOMM40L	scf_rhity00005237	100.000	127	0	593	719	97034	97160	3.10e-59	235	-
R. typus	XM_020523825.1	TOMM40L	scf_rhity00027030	98.810	84	0	715	798	2599	2516	1.16e-33	150	-
R. typus	XM_020523825.1	TOMM40L	scf_rhity00027030	98.291	117	2	789	905	2068	1954	8.74e-50	204	-
R. typus	XM_020523825.1	TOMM40L	scf_rhity00155028	100.000	142	0	897	1038	270	129	1.42e-67	263	-
R. typus	XM_020523967.1	NDUFS2	scf_rhity00028733	100.000	223	0	1	223	2002	1780	1.42e-112	412	-
R. typus	XM_020523967.1	NDUFS2	scf_rhity00010013	98.361	122	1	218	339	7337	7217	1.54e-52	213	-
R. typus	XM_020523967.1	NDUFS2	scf_rhity00010013	100.000	78	0	335	412	6090	6013	5.71e-32	145	-
R. typus	XM_020523967.1	NDUFS2	scf_rhity00010013	98.824	85	0	408	492	4874	4790	3.41e-34	152	-
R. typus	XM_020523967.1	NDUFS2	scf_rhity00010013	100.000	88	0	488	575	4453	4366	1.58e-37	163	-
R. typus	XM_020523967.1	NDUFS2	scf_rhity00010013	100.000	125	0	573	697	4240	4116	4.26e-58	231	-
R. typus	XM_020523967.1	NDUFS2	scf_rhity00010013	100.000	133	0	693	825	3956	3824	1.52e-62	246	-
R. typus	XM_020523967.1	NDUFS2	scf_rhity00096406	100.000	99	0	824	922	1297	1199	1.21e-43	183	-
R. typus	XM_020523967.1	NDUFS2	scf_rhity00096406	100.000	87	0	920	1006	591	505	5.67e-37	161	-
R. typus	XM_020523967.1	NDUFS2	scf_rhity00067765	100.000	61	0	1005	1065	1858	1798	1.61e-22	113	-
R. typus	XM_020523967.1	NDUFS2	scf_rhity00111163	100.000	39	0	1063	1101	945	907	2.73e-10	73.1	-
C. milii	XM_007910528.1	COL2A1	scf_rhity00026090	83.041	171	2	105	274	2000	1831	3.75e-34	154	-
C. milii	XM_007910528.1	COL2A1	scf_rhity00004791	91.139	79	0	535	613	9914	9992	2.96e-20	108	-
C. milii	XM_007910528.1	COL2A1	scf_rhity00004791	91.489	47	0	612	658	13353	13399	1.81e-07	65.8	-
C. milii	XM_007910528.1	COL2A1	scf_rhity00004791	87.273	55	0	658	712	13569	13623	6.50e-07	63.9	-
C. milii	XM_007910528.1	COL2A1	scf_rhity00004791	91.071	56	1	766	820	15147	15202	3.00e-10	75.0	-
C. milii	XM_007910528.1	COL2A1	scf_rhity00004791	83.929	56	0	918	973	17943	17998	3.91e-04	54.7	-
C. milii	XM_007910528.1	COL2A1	scf_rhity00004791	93.182	44	0	973	1016	18765	18808	1.81e-07	65.8	-
C. milii	XM_007910528.1	COL2A1	scf_rhity00004791	81.731	104	1	1067	1169	25812	25915	1.39e-13	86.1	-
C. milii	XM_007910528.1	COL2A1	scf_rhity00004791	89.130	46	0	1171	1216	26398	26443	3.02e-05	58.4	-
C. milii	XM_007910528.1	COL2A1	scf_rhity00004791	79.787	94	0	1216	1309	27715	27808	1.40e-08	69.4	-
C. milii	XM_007910528.1	COL2A1	scf_rhity00004791	88.679	53	0	1312	1364	29421	29473	1.81e-07	65.8	-
C. milii	XM_007910528.1	COL2A1	scf_rhity00004791	76.768	99	2	1531	1628	35687	35784	3.91e-04	54.7	-
C. milii	XM_007910528.1	COL2A1	scf_rhity00004791	80.000	105	0	1886	1990	43049	43153	2.32e-11	78.7	-
C. milii	XM_007910528.1	COL2A1	scf_rhity00004791	80.282	71	0	1988	2058	43243	43313	3.91e-04	54.7	-
C. milii	XM_007910528.1	COL2A1	scf_rhity00004791	88.000	50	0	2097	2146	44621	44670	8.41e-06	60.2	-
C. milii	XM_007910528.1	COL2A1	scf_rhity00004791	76.074	163	0	2533	2695	53858	54020	1.39e-13	86.1	-
C. milii	XM_007910528.1	COL2A1	scf_rhity00004791	83.673	98	0	2695	2792	54312	54409	8.29e-16	93.5	-
C. milii	XM_007910528.1	COL2A1	scf_rhity00004791	78.761	113	0	2799	2911	62253	62365	8.35e-11	76.8	-
C. milii	XM_007910528.1	COL2A1	scf_rhity00004791	84.211	57	0	2909	2965	62456	62512	1.09e-04	56.5	-
C. milii	XM_007910528.1	COL2A1	scf_rhity00004791	80.531	113	4	2963	3073	64620	64730	4.99e-13	84.2	-
C. milii	XM_007910528.1	COL2A1	scf_rhity00004791	85.455	55	0	3073	3127	64961	65015	3.02e-05	58.4	-
C. milii	XM_007910528.1	COL2A1	scf_rhity00004791	85.321	109	0	3127	3235	65724	65832	6.36e-22	113	-
C. milii	XM_007910528.1	COL2A1	scf_rhity00004791	80.000	105	1	3285	3389	70146	70249	8.35e-11	76.8	-
C. milii	XM_007910528.1	COL2A1	scf_rhity00004791	81.879	298	1	3391	3687	70405	70702	4.65e-63	250	-
C. milii	XM_007910528.1	COL2A1	scf_rhity00004791	86.702	188	0	3685	3872	71094	71281	7.89e-51	209	-
C. milii	XM_007910528.1	COL2A1	scf_rhity00004791	86.853	251	2	3867	4116	72281	72530	5.93e-72	279	-
C. milii	XM_007910528.1	COL2A1	scf_rhity00004791	93.919	148	0	4116	4263	73104	73251	2.82e-55	224	-
R. typus	XM_020524727.1	TMEM106C	scf_rhity00004791	99.200	125	0	1	125	99575	99451	1.01e-56	226	+
R. typus	XM_020524727.1	TMEM106C	scf_rhity00004791	98.551	69	0	120	188	99519	99451	1.37e-25	122	+
R. typus	XM_020524727.1	TMEM106C	scf_rhity00004791	98.592	71	1	162	232	99519	99450	3.80e-26	124	+
R. typus	XM_020524727.1	TMEM106C	scf_rhity00004791	97.826	46	0	183	228	99519	99474	8.34e-13	80.5	+
R. typus	XM_020524727.1	TMEM106C	scf_rhity00004791	99.333	150	1	223	371	99108	98959	4.61e-70	270	+
R. typus	XM_020524727.1	TMEM106C	scf_rhity00004791	100.000	53	0	367	419	98612	98560	2.30e-18	99.0	+
R. typus	XM_020524727.1	TMEM106C	scf_rhity00004791	100.000	55	0	420	474	93438	93384	1.78e-19	102	+
R. typus	XM_020524727.1	TMEM106C	scf_rhity00004791	97.368	114	3	464	576	86269	86158	3.69e-46	191	+
C. milii	XM_007910507.1	VDR	scf_rhity00008426	79.739	153	0	1	153	19353	19505	6.88e-22	111	-
C. milii	XM_007910507.1	VDR	scf_rhity00008426	87.879	132	0	150	281	31282	31413	3.13e-35	156	-
C. milii	XM_007910507.1	VDR	scf_rhity00011943	82.927	123	0	286	408	1588	1710	6.88e-22	111	-
C. milii	XM_007910507.1	VDR	scf_rhity00011943	84.091	88	0	684	771	18784	18871	4.17e-14	86.1	-
C. milii	XM_007910507.1	VDR	scf_rhity00013198	83.212	137	4	765	899	4730	4864	3.18e-25	122	-
C. milii	XM_007910507.1	VDR	scf_rhity00010247	82.075	106	0	921	1026	6305	6410	8.96e-16	91.6	-
H. sapiens	NM_001098416.3	HDAC7	Not Found	-	-	-	-	-	-	-	-	-	-

## Sheet: Table S3
Table S3. Blast-n output of human, elephant shark and whale shark (first version) genome sequences against the brownbanded bamboo shark genome. The blast-n values were used to reconstruct the synteny of the locus in three target PXR, CAR and VDR.
Bait Species	Accession Number	Gene Symbol	Scaffolds of C.punctatums Genome	ID%	Length	Gaps	qstart	qend	sstart	send	E-valeu	Bitscore	Strand
R. typus	XM_020529932.1	POPDC2	scf_chipu00000056	95.951	494	0	1	494	4992671	4993164	0.0	802	-
R. typus	XM_020529932.1	POPDC2	scf_chipu00000056	95.614	114	0	492	605	5000060	5000173	1.41e-43	183	-
R. typus	XM_020529932.1	POPDC2	scf_chipu00000056	95.942	345	1	597	940	5003176	5003520	2.01e-156	558	-
R. typus	XM_020529932.1	POPDC2	scf_chipu00000056	94.667	75	0	940	1014	5015810	5015884	1.45e-23	117	-
R. typus	XM_020529942.1	COX17	scf_chipu00000056	93.496	123	0	3	125	4956135	4956257	2.61e-44	183	-
R. typus	XM_020529942.1	COX17	scf_chipu00000056	97.619	84	0	125	208	4964003	4964086	1.23e-32	145	-
R. typus	XM_020521822.1	MAATS1	scf_chipu00000056	91.667	156	0	1	156	4775262	4775107	2.94e-53	217	+
R. typus	XM_020521822.1	MAATS1	scf_chipu00000056	92.771	83	0	160	242	4771175	4771093	2.37e-24	121	+
R. typus	XM_020521822.1	MAATS1	scf_chipu00000056	93.333	60	0	241	300	4759671	4759612	6.69e-15	89.8	+
R. typus	XM_020521822.1	MAATS1	scf_chipu00015270	92.222	180	0	297	476	369	548	6.23e-65	255	+
R. typus	XM_020521822.1	MAATS1	scf_chipu00000056	98.333	180	0	475	654	4750844	4750665	2.82e-83	316	+
R. typus	XM_020521822.1	MAATS1	scf_chipu00000056	95.570	158	0	654	811	4746570	4746413	2.24e-64	254	+
R. typus	XM_020521822.1	MAATS1	scf_chipu00000056	92.021	188	0	810	997	4731836	4731649	1.04e-67	265	+
R. typus	XM_020521822.1	MAATS1	scf_chipu00000056	95.775	142	0	994	1135	4726590	4726449	3.78e-57	230	+
R. typus	XM_020521822.1	MAATS1	scf_chipu00075376	90.840	131	3	1133	1263	642	769	6.45e-40	172	+
R. typus	XM_020521822.1	MAATS1	scf_chipu00000056	93.243	74	0	1250	1323	4708525	4708452	5.13e-21	110	+
R. typus	XM_020521822.1	MAATS1	scf_chipu00000056	96.622	148	0	1323	1470	4707512	4707365	3.75e-62	246	+
R. typus	XM_020521822.1	MAATS1	scf_chipu00000056	96.460	226	0	1469	1694	4706591	4706366	1.65e-100	374	+
R. typus	XM_020521822.1	MAATS1	scf_chipu00000056	94.737	152	0	1690	1841	4705776	4705625	2.26e-59	237	+
R. typus	XM_020521822.1	MAATS1	scf_chipu00000056	92.708	96	1	1842	1936	4704759	4704664	2.35e-29	137	+
R. typus	XM_020521822.1	MAATS1	scf_chipu00000056	86.957	184	1	1932	2112	4702337	4702154	2.29e-49	204	+
H. sapiens / C . milii	NM_003889.3 / XM_007910507.1	PXR	Not Found	-	-	-	-	-	-	-	-	-	-
R. typus	XM_020510094.1	GSK3B	scf_chipu00000056	100.000	89	0	1	89	4481147	4481235	6.41e-38	165	-
R. typus	XM_020510094.1	GSK3B	scf_chipu00000056	95.337	193	0	89	281	4550303	4550495	1.01e-80	307	-
R. typus	XM_020510094.1	GSK3B	scf_chipu00000056	100.000	84	0	283	366	4580702	4580785	3.86e-35	156	-
R. typus	XM_020510094.1	GSK3B	scf_chipu00000056	96.460	113	0	365	477	4607809	4607921	1.37e-44	187	-
R. typus	XM_020510094.1	GSK3B	scf_chipu00000056	99.237	131	0	478	608	4615195	4615325	1.34e-59	237	-
R. typus	XM_020510094.1	GSK3B	scf_chipu00000056	98.165	109	0	607	715	4627538	4627646	1.06e-45	191	-
R. typus	XM_020510094.1	GSK3B	scf_chipu00000056	100.000	103	0	713	815	4630583	4630685	1.06e-45	191	-
R. typus	XM_020510094.1	GSK3B	scf_chipu00000056	98.000	100	0	812	911	4631396	4631495	1.07e-40	174	-
R. typus	XM_020510094.1	GSK3B	scf_chipu00000056	98.942	189	0	908	1096	4644749	4644937	3.57e-90	339	-
R. typus	XM_020510094.1	GSK3B	scf_chipu00000056	95.050	101	0	1095	1195	4649239	4649339	2.98e-36	159	-
R. typus	XM_020510094.1	GSK3B	scf_chipu00000056	95.946	74	0	1193	1266	4656936	4657009	1.41e-24	121	-
R. typus	XM_020510092.1	GPR156	scf_chipu00000056	94.872	78	0	1	78	4385393	4385470	7.38e-25	122	-
R. typus	XM_020510092.1	GPR156	scf_chipu00000056	92.414	145	0	72	216	4387707	4387851	1.98e-50	207	-
R. typus	XM_020510092.1	GPR156	scf_chipu00000056	95.726	117	0	211	327	4397052	4397168	7.18e-45	189	-
R. typus	XM_020510092.1	GPR156	scf_chipu00000056	91.406	128	0	327	454	4409602	4409729	5.59e-41	176	-
R. typus	XM_020510092.1	GPR156	scf_chipu00000056	95.098	102	0	453	554	4409864	4409965	1.56e-36	161	-
R. typus	XM_020510092.1	GPR156	scf_chipu00000056	94.606	241	0	548	788	4412776	4413016	1.85e-100	374	-
R. typus	XM_020510092.1	GPR156	scf_chipu00000056	96.364	165	0	784	948	4417282	4417446	6.93e-70	272	-
R. typus	XM_020510092.1	GPR156	scf_chipu00000056	91.081	1424	4	940	2361	4418947	4420368	0.0	1923	-
R. typus	XM_020510093.1	LRRC58	scf_chipu00000056	84.615	65	0	73	137	4283016	4283080	3.83e-08	65.8	-
R. typus	XM_020510093.1	LRRC58	scf_chipu00000056	96.947	131	0	137	267	4286041	4286171	7.73e-55	220	-
R. typus	XM_020510093.1	LRRC58	scf_chipu00000056	94.585	277	0	269	545	4287447	4287723	1.18e-117	429	-
R. typus	XM_020510093.1	LRRC58	scf_chipu00000056	96.429	196	0	543	738	4289865	4290060	5.73e-86	324	-
C. milii	XM_007895843.1	FST1L	scf_chipu00000056	80.556	108	0	460	567	4020679	4020786	3.40e-13	84.2	-
C. milii	XM_007895843.1	FST1L	scf_chipu00000056	81.731	104	0	563	666	4022328	4022431	2.63e-14	87.9	-
C. milii	XM_007895843.1	FST1L	scf_chipu00000056	88.571	70	0	669	738	4023195	4023264	9.46e-14	86.1	-
C. milii	XM_007895843.1	FST1L	scf_chipu00000056	79.070	86	0	781	866	4026553	4026638	5.73e-06	60.2	-
C. milii	XM_007895843.1	FST1L	scf_chipu00000056	78.947	76	0	928	1003	4029827	4029902	0.001	52.8	-
C. milii	XM_007895843.1	FST1L	scf_chipu00000056	87.129	101	2	1411	1510	4153418	4153517	4.34e-22	113	-
C. milii	XM_007895843.1	FST1L	scf_chipu00000056	86.916	107	0	1525	1631	4161165	4161271	2.59e-24	121	-
C. milii	XM_007895843.1	FST1L	scf_chipu00000056	83.206	131	0	1677	1807	4165635	4165765	2.59e-24	121	-
C. milii	XM_007895843.1	FST1L	scf_chipu00000056	80.952	105	3	1808	1910	4172054	4172156	4.40e-12	80.5	-
C. milii	XM_007895843.1	FST1L	scf_chipu00000056	92.373	118	1	1927	2044	4173639	4173755	3.28e-38	167	-
C. milii	XM_007895843.1	FST1L	scf_chipu00000056	88.793	116	1	2039	2154	4179859	4179973	1.99e-30	141	-
C. milii	XM_007895843.1	FST1L	scf_chipu00000056	85.246	61	0	2203	2263	4181469	4181529	4.43e-07	63.9	-
C. milii	XM_007895843.1	FST1L	scf_chipu00000056	89.362	47	0	2261	2307	4194117	4194163	5.73e-06	60.2	-
H. sapiens	NM_001102566.1	PCP4L1	scf_chipu00019604	79.268	82	0	100	181	1318	1399	1.62e-06	58.4	-
H. sapiens	NM_001077482.2	CAR	Not Found	-	-	-	-	-	-	-	-	-
R. typus	XM_020523825.1	TOMM40L	scf_chipu00000039	91.304	46	1	96	140	1210516	1210471	7.06e-07	62.1	-
R. typus	XM_020523825.1	TOMM40L	scf_chipu00055375	95.876	97	0	292	388	900	996	8.76e-36	158	-
R. typus	XM_020523825.1	TOMM40L	scf_chipu00055375	91.346	104	0	386	489	1658	1761	2.45e-31	143	-
R. typus	XM_020523825.1	TOMM40L	scf_chipu00169312	89.189	111	0	486	596	405	515	3.17e-30	139	-
R. typus	XM_020523825.1	TOMM40L	scf_chipu00021705	93.966	116	0	604	719	2789	2674	2.42e-41	176	-
R. typus	XM_020523825.1	TOMM40L	scf_chipu00122405	85.000	80	0	716	795	732	811	5.42e-13	82.4	-
R. typus	XM_020523825.1	TOMM40L	scf_chipu00006027	90.351	114	1	793	906	10566	10454	5.27e-33	148	-
R. typus	XM_020523825.1	TOMM40L	scf_chipu00006027	89.437	142	0	897	1038	7081	6940	1.87e-42	180	-
R. typus	XM_020523967.1	NDUFS2	scf_chipu00004839	83.550	231	6	2	223	18979	18751	3.28e-50	206	-
R. typus	XM_020523967.1	NDUFS2	scf_chipu00050391	94.118	119	1	218	336	735	852	1.99e-42	180	-
R. typus	XM_020523967.1	NDUFS2	scf_chipu00062202	97.436	78	0	335	412	640	717	1.57e-28	134	-
R. typus	XM_020523967.1	NDUFS2	scf_chipu00062202	96.552	87	1	403	489	1478	1563	2.60e-31	143	-
R. typus	XM_020523967.1	NDUFS2	scf_chipu00004839	90.909	88	0	488	575	8527	8440	4.39e-24	119	-
R. typus	XM_020523967.1	NDUFS2	scf_chipu00004839	91.200	125	0	573	697	8336	8212	1.19e-39	171	-
R. typus	XM_020523967.1	NDUFS2	scf_chipu00004839	90.977	133	0	693	825	7794	7662	1.99e-42	180	-
R. typus	XM_020523967.1	NDUFS2	scf_chipu00004839	92.929	99	0	824	922	4501	4403	7.24e-32	145	-
R. typus	XM_020523967.1	NDUFS2	scf_chipu00004839	90.526	95	2	914	1006	4314	4220	9.43e-26	124	-
R. typus	XM_020523967.1	NDUFS2	scf_chipu00037270	88.525	61	0	1005	1065	2241	2181	9.64e-11	75.0	-
C. milii	XM_007910528.1	COL2A1	scf_chipu00001599	82.486	177	2	99	274	154649	154824	4.75e-34	154	-
C. milii	XM_007910528.1	COL2A1	scf_chipu00001599	86.000	50	0	440	489	164583	164632	4.96e-04	54.7	-
C. milii	XM_007910528.1	COL2A1	scf_chipu00001599	89.873	79	0	535	613	167343	167421	1.75e-18	102	-
C. milii	XM_007910528.1	COL2A1	scf_chipu00001599	91.489	47	0	612	658	171023	171069	2.29e-07	65.8	-
C. milii	XM_007910528.1	COL2A1	scf_chipu00001599	89.091	55	0	658	712	171240	171294	1.77e-08	69.4	-
C. milii	XM_007910528.1	COL2A1	scf_chipu00001599	91.071	56	1	766	820	172856	172911	3.81e-10	75.0	-
C. milii	XM_007910528.1	COL2A1	scf_chipu00001599	90.909	44	0	973	1016	176005	176048	1.07e-05	60.2	-
C. milii	XM_007910528.1	COL2A1	scf_chipu00001599	82.075	106	1	1070	1175	183936	184040	1.36e-14	89.8	-
C. milii	XM_007910528.1	COL2A1	scf_chipu00001599	89.130	46	0	1171	1216	184516	184561	3.83e-05	58.4	-
C. milii	XM_007910528.1	COL2A1	scf_chipu00001599	79.787	94	0	1216	1309	185910	186003	1.77e-08	69.4	-
C. milii	XM_007910528.1	COL2A1	scf_chipu00001599	85.938	64	4	1307	1368	187431	187492	2.29e-07	65.8	-
C. milii	XM_007910528.1	COL2A1	scf_chipu00001599	83.607	61	0	1786	1846	198458	198518	3.83e-05	58.4	-
C. milii	XM_007910528.1	COL2A1	scf_chipu00001599	82.243	107	0	1884	1990	202542	202648	1.05e-15	93.5	-
C. milii	XM_007910528.1	COL2A1	scf_chipu00001599	90.244	41	0	2106	2146	203736	203776	4.96e-04	54.7	-
C. milii	XM_007910528.1	COL2A1	scf_chipu00001599	77.914	163	0	2533	2695	212510	212672	1.75e-18	102	-
C. milii	XM_007910528.1	COL2A1	scf_chipu00001599	82.653	98	0	2695	2792	212983	213080	4.89e-14	87.9	-
C. milii	XM_007910528.1	COL2A1	scf_chipu00001599	78.632	117	1	2797	2911	220830	220946	1.06e-10	76.8	-
C. milii	XM_007910528.1	COL2A1	scf_chipu00001599	86.207	58	2	2909	2965	221036	221092	2.96e-06	62.1	-
C. milii	XM_007910528.1	COL2A1	scf_chipu00001599	82.524	103	0	2963	3065	223076	223178	3.78e-15	91.6	-
C. milii	XM_007910528.1	COL2A1	scf_chipu00001599	85.455	55	0	3073	3127	223418	223472	3.83e-05	58.4	-
C. milii	XM_007910528.1	COL2A1	scf_chipu00001599	88.991	109	0	3127	3235	224091	224199	1.72e-28	135	-
C. milii	XM_007910528.1	COL2A1	scf_chipu00001599	80.952	105	1	3285	3389	227792	227895	2.27e-12	82.4	-
C. milii	XM_007910528.1	COL2A1	scf_chipu00001599	81.544	298	1	3391	3687	228051	228348	2.74e-61	244	-
C. milii	XM_007910528.1	COL2A1	scf_chipu00001599	87.831	189	0	3685	3873	228756	228944	1.28e-54	222	-
C. milii	XM_007910528.1	COL2A1	scf_chipu00001599	91.628	215	0	3902	4116	229975	230189	2.07e-77	298	-
C. milii	XM_007910528.1	COL2A1	scf_chipu00001599	93.243	148	0	4116	4263	230763	230910	1.66e-53	219	-
R. typus	XM_020524727.1	TMEM106C	scf_chipu00001599	94.340	106	1	472	576	241387	241282	3.67e-37	161	+
R. typus	XM_020524727.1	TMEM106C	scf_chipu00001599	96.296	54	0	421	474	252505	252452	1.75e-15	89.8	+
R. typus	XM_020524727.1	TMEM106C	scf_chipu00001599	92.453	53	0	367	419	257715	257663	1.37e-11	76.8	+
R. typus	XM_020524727.1	TMEM106C	scf_chipu00001599	96.000	150	1	223	371	258189	258040	1.27e-61	243	+
R. typus	XM_020524727.1	TMEM106C	scf_chipu00000025	74.843	159	7	63	220	4017375	4017223	2.96e-08	65.8	+
C. milii	XM_007910507.1	VDR	scf_chipu00001415	89.216	102	0	52	153	196819	196718	8.65e-27	128	-
C. milii	XM_007910507.1	VDR	scf_chipu00001415	87.023	131	0	151	281	177111	176981	6.64e-33	148	-
C. milii	XM_007910507.1	VDR	scf_chipu00001415	78.431	153	0	286	438	143743	143591	1.89e-18	100	-
C. milii	XM_007910507.1	VDR	scf_chipu00001415	82.796	93	1	687	778	123346	123254	6.83e-13	82.4	-
C. milii	XM_007910507.1	VDR	scf_chipu00001415	83.582	134	4	768	899	97142	97011	4.03e-25	122	-
C. milii	XM_007910507.1	VDR	scf_chipu00001415	82.353	119	0	921	1039	85238	85120	1.46e-19	104	-
C. milii	XM_007910507.1	VDR	scf_chipu00001415	81.250	64	0	1159	1222	72435	72372	5.36e-04	52.8	-
H. sapiens	NM_001098416.3	HDAC7	Not Found	-	-	-	-	-	-	-	-	-	-

## Sheet: Table S4
Table S4. Blast-n output of human, elephant shark and whale shark (first version) genome sequences against the against the cloudy catshark genome. The blast-n values were used to reconstruct the synteny of the locus in three target PXR, CAR and VDR.
Bait Species	Accession Number	Gene Symbol	Scaffolds of R. typus Genome	ID%	Length	Gaps	qstart	qend	sstart	send	E-valeu	Bitscore	Strand
R. typus	XM_020529932.1	POPDC2	scf_scyto00004451	86.842	494	0	1	494	110476	110969	1.23e-154	553	-
R. typus	XM_020529932.1	POPDC2	scf_scyto00004451	93.023	344	0	597	940	121940	122283	1.26e-139	503	-
R. typus	XM_020529932.1	POPDC2	scf_scyto00004451	92.920	113	0	493	605	114005	114117	6.75e-38	165	-
R. typus	XM_020529932.1	POPDC2	scf_scyto00004451	85.333	75	0	940	1014	128612	128686	9.05e-12	78.7	-
R. typus	XM_020529942.1	COX17	scf_scyto00004451	88.618	123	0	3	125	25599	25721	3.48e-34	150	-
R. typus	XM_020529942.1	COX17	scf_scyto00004451	90.698	86	0	125	210	36134	36219	1.27e-23	115	-
R. typus	XM_020521822.1	MAATS1	scf_scyto00010339	87.898	157	0	1	157	102924	103080	1.1e-43	185	+
R. typus	XM_020521822.1	MAATS1	scf_scyto00010954	85.882	85	1	155	239	5469	5552	8.85e-15	89.8	+
R. typus	XM_020521822.1	MAATS1	scf_scyto00010954	85.075	67	2	234	300	11980	12044	4.14e-08	67.6	+
R. typus	XM_020521822.1	MAATS1	scf_scyto00010954	90.714	140	0	337	476	17821	17960	3.05e-44	187	+
R. typus	XM_020521822.1	MAATS1	scf_scyto00010954	93.333	180	0	475	654	20228	20407	3.81e-68	267	+
R. typus	XM_020521822.1	MAATS1	scf_scyto00010954	85.185	162	2	651	811	42066	42226	1.43e-37	165	+
R. typus	XM_020521822.1	MAATS1	scf_scyto00010954	85.638	188	0	810	997	83401	83588	1.41e-47	198	+
R. typus	XM_020521822.1	MAATS1	scf_scyto00010954	87.413	143	2	994	1135	84704	84845	5.14e-37	163	+
R. typus	XM_020521822.1	MAATS1	scf_scyto00010954	83.916	143	5	1119	1260	92673	92810	1.45e-27	132	+
R. typus	XM_020521822.1	MAATS1	scf_scyto00019089	85.366	82	1	1250	1329	13565	13646	4.12e-13	84.2	+
R. typus	XM_020521822.1	MAATS1	scf_scyto00019089	92.763	152	1	1320	1470	14575	14726	1.08e-53	219	+
R. typus	XM_020521822.1	MAATS1	scf_scyto00019089	90.708	226	0	1469	1694	16466	16691	1.04e-78	302	+
R. typus	XM_020521822.1	MAATS1	scf_scyto00019089	90.132	152	0	1690	1841	21232	21383	1.41e-47	198	+
R. typus	XM_020521822.1	MAATS1	scf_scyto00012507	90.698	86	1	1852	1936	8615	8700	5.25e-22	113	+
R. typus	XM_020521822.1	MAATS1	scf_scyto00012507	82.209	163	0	1932	2094	22807	22969	2.41e-30	141	+
H. sapiens / C . milii	NM_003889.3 / XM_007910507.1	PXR	Not Found	-	-	-	-	-	-	-	-	-
R. typus	XM_020510094.1	GSK3B	scf_scyto00012507	93.151	73	0	1194	1266	70445	70373	1.45e-20	108	-
R. typus	XM_020510094.1	GSK3B	scf_scyto00087619	90.385	104	0	1095	1198	696	593	1.85e-29	137	-
R. typus	XM_020510094.1	GSK3B	scf_scyto00001496	95.238	189	0	908	1096	523941	524129	2.23e-78	300	-
R. typus	XM_020510094.1	GSK3B	scf_scyto00001496	96.000	100	0	812	911	507821	507920	3.05e-37	163	-
R. typus	XM_020510094.1	GSK3B	scf_scyto00001496	97.087	103	0	713	815	506971	507073	1.41e-40	174	-
R. typus	XM_020510094.1	GSK3B	scf_scyto00001496	96.330	109	0	607	715	504105	504213	3.03e-42	180	-
R. typus	XM_020510094.1	GSK3B	scf_scyto00001496	96.947	131	0	478	608	488029	488159	1.79e-54	220	-
R. typus	XM_020510094.1	GSK3B	scf_scyto00001496	95.575	113	0	365	477	476725	476837	8.42e-43	182	-
R. typus	XM_020510094.1	GSK3B	scf_scyto00001496	98.810	84	0	283	366	438710	438793	2.38e-33	150	-
R. typus	XM_020510094.1	GSK3B	scf_scyto00001496	92.228	193	0	89	281	413329	413521	1.35e-70	274	-
R. typus	XM_020510094.1	GSK3B	scf_scyto00001496	100.000	89	0	1	89	334378	334466	8.48e-38	165	-
R. typus	XM_020510092.1	GPR156	scf_scyto00001496	80.336	1429	18	947	2361	238954	240374	0	1062	-
R. typus	XM_020510092.1	GPR156	scf_scyto00001496	94.545	165	0	784	948	237552	237716	9.23e-65	255	-
R. typus	XM_020510092.1	GPR156	scf_scyto00001496	88.163	245	0	548	792	213963	214207	7.03e-76	292	-
R. typus	XM_020510092.1	GPR156	scf_scyto00001496	90.196	102	0	453	554	206120	206221	4.51e-28	134	-
R. typus	XM_020510092.1	GPR156	scf_scyto00001496	86.719	128	0	327	454	205611	205738	7.5e-31	143	-
R. typus	XM_020510092.1	GPR156	scf_scyto00001496	88.889	117	0	211	327	186015	186131	2.08e-31	145	-
R. typus	XM_020510092.1	GPR156	scf_scyto00001496	86.525	141	0	76	216	167043	167183	9.63e-35	156	-
R. typus	XM_020510092.1	GPR156	scf_scyto00001496	92.683	82	1	1	81	157588	157669	4.54e-23	117	-
R. typus	XM_020510093.1	LRRC58	scf_scyto00000214	91.603	131	0	137	267	1067413	1067543	4.83e-43	182	-
R. typus	XM_020510093.1	LRRC58	scf_scyto00000214	90.614	277	0	269	545	1067963	1068239	3.45e-99	368	-
R. typus	XM_020510093.1	LRRC58	scf_scyto00000214	92.857	196	0	543	738	1074112	1074307	3.58e-74	285	-
C. milii	XM_007895843.1	FST1L	scf_scyto00000214	74.419	172	4	87	257	715659	715826	1.26e-08	69.4	-
C. milii	XM_007895843.1	FST1L	scf_scyto00000214	81.481	108	0	460	567	728379	728486	9.68e-15	89.8	-
C. milii	XM_007895843.1	FST1L	scf_scyto00000214	84.466	103	0	564	666	744011	744113	1.24e-18	102	-
C. milii	XM_007895843.1	FST1L	scf_scyto00000214	90.141	71	0	668	738	744837	744907	7.48e-16	93.5	-
C. milii	XM_007895843.1	FST1L	scf_scyto00000214	80.198	101	0	778	878	748572	748672	7.53e-11	76.8	-
C. milii	XM_007895843.1	FST1L	scf_scyto00000214	91.209	91	0	1420	1510	892369	892459	2.65e-25	124	-
C. milii	XM_007895843.1	FST1L	scf_scyto00000214	85.185	135	0	1508	1642	903903	904037	9.47e-30	139	-
C. milii	XM_007895843.1	FST1L	scf_scyto00000214	85.714	133	0	1677	1809	912086	912218	2.63e-30	141	-
C. milii	XM_007895843.1	FST1L	scf_scyto00000214	80.342	117	6	1813	1925	925742	925854	1.62e-12	82.4	-
C. milii	XM_007895843.1	FST1L	scf_scyto00000214	89.916	119	1	1927	2045	927808	927925	1.22e-33	152	-
C. milii	XM_007895843.1	FST1L	scf_scyto00000214	87.200	125	1	2039	2163	939494	939617	2.63e-30	141	-
C. milii	XM_007895843.1	FST1L	scf_scyto00000214	83.607	61	0	2203	2263	941514	941574	2.73e-05	58.4	-
C. milii	XM_007895843.1	FST1L	scf_scyto00000214	95.745	47	0	2261	2307	944073	944119	7.53e-11	76.8	-
H. sapiens	NM_001102566.1	PCP4L1	scf_scyto00161034	83.529	85	0	97	181	1030	946	4.56e-13	80.5	-
H. sapiens	NM_001077482.2	CAR	Not Found	-	-	-	-	-	-	-	-	-
R. typus	XM_020523825.1	TOMM40L	scf_scyto00132904	91.525	59	0	168	226	98	40	7.17e-13	82.4	-
R. typus	XM_020523825.1	TOMM40L	scf_scyto00013824	91.892	74	0	225	298	52160	52233	1.53e-19	104	-
R. Typus	XM_020523825.1	TOMM40L	scf_scyto00013824	86.458	96	0	293	388	54607	54702	4.25e-20	106	-
R. typus	XM_020523825.1	TOMM40L	scf_scyto00013824	88.462	104	0	386	489	60099	60202	3.26e-26	126	-
R. typus	XM_020523825.1	TOMM40L	scf_scyto00013824	88.785	107	0	487	593	60788	60894	7.02e-28	132	-
R. typus	XM_020523825.1	TOMM40L	scf_scyto00010387	88.235	119	2	602	719	103337	103220	1.17e-30	141	-
R. typus	XM_020523825.1	TOMM40L	scf_scyto00010387	85.333	75	0	724	798	101406	101332	9.27e-12	78.7	-
R. typus	XM_020523825.1	TOMM40L	scf_scyto00010387	88.235	119	2	602	719	103337	103220	1.17e-30	141	-
R. typus	XM_020523825.1	TOMM40L	scf_scyto00010387	85.333	75	0	724	798	101406	101332	9.27e-12	78.7	-
R. typus	XM_020523825.1	TOMM40L	scf_scyto00010387	90.845	142	0	897	1038	95986	95845	1.14e-45	191	-
R. typus	XM_020523967.1	NDUFS2	scf_scyto00049214	86.179	123	0	101	223	153	31	2.07e-28	134	-
R. typus	XM_020523967.1	NDUFS2	scf_scyto00391764	91.026	78	0	335	412	584	507	4.52e-20	106	-
R. typus	XM_020523967.1	NDUFS2	scf_scyto00391764	86.364	66	0	424	489	322	257	4.58e-10	73.1	-
R. typus	XM_020523967.1	NDUFS2	scf_scyto00432542	90.909	88	0	488	575	118	205	5.8e-24	119	-
R. typus	XM_020523967.1	NDUFS2	scf_scyto00432542	87.200	125	0	573	697	303	427	3.44e-31	143	-
R. typus	XM_020523967.1	NDUFS2	scf_scyto00254062	82.090	134	0	692	825	950	817	7.51e-23	115	-
R. typus	XM_020523967.1	NDUFS2	scf_scyto00034789	87.879	99	0	824	922	3516	3418	2.09e-23	117	-
C. milii	XM_007910528.1	COL2A1	scf_scyto00020566	82.738	168	2	132	298	2862	2696	2.93e-32	148	-
C. milii	XM_007910528.1	COL2A1	scf_scyto00081496	94.595	37	0	311	347	1412	1376	5.07e-05	58.4	-
C. milii	XM_007910528.1	COL2A1	scf_scyto00007676	89.873	79	0	535	613	149294	149216	2.31e-18	102	-
C. milii	XM_007910528.1	COL2A1	scf_scyto00007676	91.489	47	0	612	658	144968	144922	3.03e-07	65.8	-
C. milii	XM_007910528.1	COL2A1	scf_scyto00007676	87.755	49	0	664	712	144750	144702	5.07e-05	58.4	-
C. milii	XM_007910528.1	COL2A1	scf_scyto00007676	91.071	56	1	766	820	143056	143001	5.04e-10	75.0	-
C. milii	XM_007910528.1	COL2A1	scf_scyto00007676	95.000	40	0	979	1018	140679	140640	1.09e-06	63.9	-
C. milii	XM_007910528.1	COL2A1	scf_scyto00007676	81.188	101	1	1070	1169	135788	135688	1.08e-11	80.5	-
C. milii	XM_007910528.1	COL2A1	scf_scyto00007676	80.682	88	0	1222	1309	134426	134339	2.34e-08	69.4	-
C. milii	XM_007910528.1	COL2A1	scf_scyto00007676	78.218	101	0	1377	1477	131776	131676	3.03e-07	65.8	-
C. milii	XM_007910528.1	COL2A1	scf_scyto00007676	84.483	58	0	1789	1846	124466	124409	5.07e-05	58.4	-
C. milii	XM_007910528.1	COL2A1	scf_scyto00007676	81.982	111	0	1883	1993	115073	114963	3.87e-16	95.3	-
C. milii	XM_007910528.1	COL2A1	scf_scyto00007676	77.570	107	0	1988	2094	114874	114768	3.03e-07	65.8	-
C. milii	XM_007910528.1	COL2A1	scf_scyto00007676	78.981	157	0	2539	2695	102368	102212	4.97e-20	108	-
C. milii	XM_007910528.1	COL2A1	scf_scyto00007676	85.047	107	0	2695	2801	102062	101956	1.38e-20	110	-
C. milii	XM_007910528.1	COL2A1	scf_scyto00007676	79.091	110	0	2802	2911	93356	93247	1.4e-10	76.8	-
C. milii	XM_007910528.1	COL2A1	scf_scyto00007676	76.577	111	0	2963	3073	89829	89719	3.92e-06	62.1	-
C. milii	XM_007910528.1	COL2A1	scf_scyto00007676	86.538	52	0	3076	3127	89465	89414	5.07e-05	58.4	-
C. milii	XM_007910528.1	COL2A1	scf_scyto00007676	88.073	109	0	3127	3235	88127	88019	1.06e-26	130	-
C. milii	XM_007910528.1	COL2A1	scf_scyto00007676	81.416	113	1	3285	3397	83843	83732	5e-15	91.6	-
C. milii	XM_007910528.1	COL2A1	scf_scyto00007676	84.247	292	1	3397	3687	83428	83137	7.69e-73	283	-
C. milii	XM_007910528.1	COL2A1	scf_scyto00007676	89.947	189	0	3685	3873	81999	81811	3.63e-61	244	-
C. milii	XM_007910528.1	COL2A1	scf_scyto00007676	87.251	251	2	3867	4116	80534	80285	2.14e-73	285	-
C. milii	XM_007910528.1	COL2A1	scf_scyto00007676	93.919	148	0	4116	4263	79787	79640	4.73e-55	224	-
R. typus	XM_020524727.1	TMEM106C	scf_scyto00007676	87.333	150	1	223	371	55335	55484	8.06e-40	171	+
R. typus	XM_020524727.1	TMEM106C	scf_scyto00007676	86.792	53	0	367	419	55787	55839	1.82e-06	60.2	+
R. typus	XM_020524727.1	TMEM106C	scf_scyto00007676	94.545	55	0	420	474	60578	60632	3e-14	86.1	+
R. typus	XM_020524727.1	TMEM106C	scf_scyto00007676	93.204	103	0	474	576	66169	66271	2.92e-34	152	+
C. milii	XM_007910507.1	VDR	scf_scyto00007144	87.500	112	0	42	153	53238	53127	3.19e-27	130	-
C. milii	XM_007910507.1	VDR	scf_scyto00007144	88.550	131	0	151	281	27042	26912	4.06e-36	159	-
C. milii	XM_007910507.1	VDR	scf_scyto00007144	81.098	164	0	284	447	645	482	8.86e-28	132	-
C. milii	XM_007910507.1	VDR	scf_scyto00012969	87.952	83	0	689	771	7071	7153	8.98e-18	99.0	-
C. milii	XM_007910507.1	VDR	scf_scyto00012969	85.926	135	0	765	899	20563	20697	1.14e-31	145	-
C. milii	XM_007910507.1	VDR	scf_scyto00012969	85.088	114	0	921	1034	29548	29661	2.48e-23	117	-
C. milii	XM_007910507.1	VDR	scf_scyto00012969	72.556	266	4	1039	1302	38914	39177	2.52e-13	84.2	-
H. sapiens	NM_001098416.3	HDAC7	Not Found	-	-	-	-	-	-	-	-	-	-
